# Supplementary material for: Soy Food Intake and Pancreatic Cancer Risk: The Japan Public Health Center–based Prospective Study
Source: Oxford University Press journal article supplement (doi:10.1158/1055-9965.epi-19-1254), 2020-03-13
Supplement: 10559965epi191254-sup-230383_2_supp_6116751_q68vjn.docx [file 10559965epi191254-sup-230383_2_supp_6116751_q68vjn.docx]

**Supplementary Table S6.** Hazard ratios and 95% confidence intervals of pancreatic cancer incidence according to quartile of soy food intake stratified by coffee intake in multivariate-adjusted models

|  | Coffee <1cup/day | | | | |  | Coffee >1cup/day | | | | |  |
| --- | --- | --- | --- | --- | --- | --- | --- | --- | --- | --- | --- | --- |
|  | Quartile of intake | | | | *P* for linear trend |  | Quartile of intake | | | | *P* for linear trend |  |
| Exposure | Lowest | Second | Third | Highest |  | Lowest | Second | Third | Highest | *P*-interaction |
| Total soy foods |  |  |  |  |  |  |  |  |  |  |  |  |
| No of cases | 61 | 87 | 84 | 133 |  |  | 39 | 50 | 47 | 45 |  |  |
| No of participants | 11044 | 13348 | 14175 | 14916 |  |  | 10266 | 8469 | 7681 | 6672 |  |  |
| Person-years | 170025 | 212643 | 229676 | 240555 |  |  | 158483 | 134471 | 124283 | 108134 |  |  |
| HR (95%CI)1 | Ref | 1.11 (0.79-1.54) | 1.00 (0.71-1.41) | 1.54 (1.11-2.12) | 0.009 |  | Ref | 1.42 (0.93-2.18) | 1.38 (0.88-2.15) | 1.47 (0.92-2.33) | 0.144 | 0.541 |
| Fermented soy foods |  |  |  |  |  |  |  |  |  |  |  |  |
| No of cases | 70 | 71 | 106 | 118 |  |  | 49 | 49 | 51 | 32 |  |  |
| No of participants | 11049 | 12767 | 14243 | 15424 |  |  | 10637 | 8925 | 7486 | 6040 |  |  |
| Person-years | 167221 | 203068 | 232390 | 250220 |  |  | 160920 | 142416 | 122175 | 99859 |  |  |
| HR (95%CI)1 | Ref | 0.79 (0.56-1.11) | 0.99 (0.71-1.38) | 0.97 (0.69-1.37) | 0.702 |  | Ref | 1.10 (0.73-1.66) | 1.21 (0.78-1.87) | 0.82 (0.49-1.38) | 0.636 | 0.605 |
| Non-fermented soy foods |  |  |  |  |  |  |  |  |  |  |  |  |
| No of cases | 65 | 100 | 91 | 109 |  |  | 40 | 37 | 57 | 47 |  |  |
| No of participants | 12308 | 13182 | 13709 | 14284 |  |  | 8728 | 8783 | 8179 | 7398 |  |  |
| Person-years | 192653 | 210486 | 221066 | 228694 |  |  | 137168 | 139439 | 130461 | 118303 |  |  |
| HR (95%CI)1 | Ref | 1.47 (1.07-2.01) | 1.31 (0.95-1.82) | 1.55 (1.12-2.14) | 0.027 |  | Ref | 0.86 (0.55-1.35) | 1.34 (0.88-2.04) | 1.23 (0.78-1.92) | 0.135 | 0.981 |
| Genistein |  |  |  |  |  |  |  |  |  |  |  |  |
| No of cases | 61 | 78 | 96 | 130 |  |  | 44 | 52 | 37 | 48 |  |  |
| No of participants | 11045 | 12913 | 14273 | 15252 |  |  | 10293 | 8846 | 7584 | 6365 |  |  |
| Person-years | 170681 | 205806 | 230612 | 245800 |  |  | 160098 | 140346 | 121807 | 103121 |  |  |
| HR (95%CI)1 | Ref | 1.04 (0.74-1.46) | 1.15 (0.82-1.61) | 1.40 (1.00-1.96) | 0.026 |  | Ref | 1.28 (0.85-1.94) | 1.01 (0.64-1.60) | 1.44 (0.92-2.27) | 0.242 | 0.355 |

1Cox proportional hazards regression models stratified by 10 study areas and adjusted for sex (men or women), age (continuous), smoking status (non-smoker, past smoker, current smoker <20, 20 to <40, >40 cigarettes/day, or unknown ), history of diabetes mellitus (yes or no), family history of pancreatic cancer (yes or no), body mass index (<20, 20 to <25, 25 to <30, >30 kg/m2, or unknown), ethanol intake (0, <150, 150 to <300, 300 to <450, >450 g/wk, or unknown ), fish intake (quartile), meat intake (quartile), vegetable intake (quartile), fruit intake (quartile), physical activity (≥1 d/wk; yes, no, or unknown), and log-transformed energy intake (continuous).

Abbreviations: CI, confidence interval; HR, hazard ratio; No., number; Ref, reference.
