# Supplementary material for: Soy Food Intake and Pancreatic Cancer Risk: The Japan Public Health Center–based Prospective Study
Source: Oxford University Press journal article supplement (doi:10.1158/1055-9965.epi-19-1254), 2020-03-13
Supplement: 10559965epi191254-sup-230383_2_supp_6116761_q68vjn.docx [file 10559965epi191254-sup-230383_2_supp_6116761_q68vjn.docx]

**Supplementary Table S5.** Hazard ratios and 95% confidence intervals of pancreatic cancer incidence according to quartile of soy food intake stratified by ethanol intake in multivariate-adjusted models

|  | Ethanol <300g/wk | | | | |  | Ethanol >300g/wk | | | | |  |
| --- | --- | --- | --- | --- | --- | --- | --- | --- | --- | --- | --- | --- |
|  | Quartile of intake | | | | *P* for linear trend |  | Quartile of intake | | | | *P* for linear trend |  |
| Exposure | Lowest | Second | Third | Highest |  | Lowest | Second | Third | Highest | *P*-interaction |
| Total soy foods |  |  |  |  |  |  |  |  |  |  |  |  |
| No of cases | 88 | 111 | 116 | 158 |  |  | 22 | 35 | 21 | 26 |  |  |
| No of participants | 18685 | 19077 | 19362 | 19773 |  |  | 3861 | 3469 | 3185 | 2773 |  |  |
| Person-years | 288741 | 304235 | 313978 | 319549 |  |  | 58380 | 54332 | 50742 | 43897 |  |  |
| HR (95%CI)1 | Ref | 1.18 (0.89-1.57) | 1.19 (0.89-1.59) | 1.58 (1.19-2.09) | 0.002 |  | Ref | 1.40 (0.81-2.43) | 0.83 (0.44-1.56) | 1.11 (0.60-2.06) | 0.761 | 0.389 |
| Fermented soy foods |  |  |  |  |  |  |  |  |  |  |  |  |
| No of cases | 116 | 97 | 129 | 131 |  |  | 12 | 34 | 30 | 28 |  |  |
| No of participants | 19286 | 18972 | 19082 | 19557 |  |  | 3260 | 3574 | 3465 | 2989 |  |  |
| Person-years | 292604 | 303078 | 312173 | 318647 |  |  | 48328 | 55431 | 55369 | 48222 |  |  |
| HR (95%CI)1 | Ref | 0.78 (0.59-1.03) | 0.96 (0.73-1.27) | 0.87 (0.65-1.18) | 0.698 |  | Ref | 2.24 (1.13-4.45) | 1.74 (0.84-3.61) | 1.74 (0.81-3.75) | 0.511 | 0.272 |
| Non-fermented soy foods |  |  |  |  |  |  |  |  |  |  |  |  |
| No of cases | 88 | 115 | 127 | 143 |  |  | 28 | 27 | 27 | 22 |  |  |
| No of participants | 18473 | 19171 | 19506 | 19747 |  |  | 4073 | 3375 | 3041 | 2799 |  |  |
| Person-years | 290058 | 306377 | 313603 | 316465 |  |  | 62743 | 52650 | 48208 | 43750 |  |  |
| HR (95%CI)1 | Ref | 1.27 (0.96-1.69) | 1.37 (1.04-1.82) | 1.55 (1.17-2.05) | 0.003 |  | Ref | 1.09 (0.64-1.87) | 1.08 (0.63-1.88) | 0.95 (0.52-1.71) | 0.876 | 0.410 |
| Genistein |  |  |  |  |  |  |  |  |  |  |  |  |
| No of cases | 92 | 110 | 117 | 154 |  |  | 26 | 27 | 22 | 29 |  |  |
| No of participants | 18703 | 19165 | 19350 | 19679 |  |  | 3843 | 3381 | 3197 | 2867 |  |  |
| Person-years | 291231 | 305558 | 312507 | 317207 |  |  | 57929 | 52886 | 50675 | 45860 |  |  |
| HR (95%CI)1 | Ref | 1.12 (0.84-1.48) | 1.15 (0.86-1.54) | 1.42 (1.07-1.89) | 0.016 |  | Ref | 0.99 (0.56-1.73) | 0.78 (0.43-1.45) | 1.01 (0.55-1.86) | 0.889 | 0.505 |

1Cox proportional hazards regression models stratified by 10 study areas and adjusted for sex (men or women), age (continuous), smoking status (non-smoker, past smoker, current smoker <20, 20 to <40, >40 cigarettes/day, or unknown ), history of diabetes mellitus (yes or no), family history of pancreatic cancer (yes or no), body mass index (<20, 20 to <25, 25 to <30, >30 kg/m2, or unknown), fish intake (quartile), meat intake (quartile), vegetable intake (quartile), fruit intake (quartile), physical activity (≥1 d/wk; yes, no, or unknown), coffee intake (≥1 cup/day; yes, no, or unknown), and log-transformed energy intake (continuous). In strata of ethanol intake, further adjusted for ethanol intake (0, <150, and 150 to <300 g/wk in ethanol intake <300 g/wk; 300 to <450 and >450 g/wk in ethanol intake >300 g/wk). Abbreviations: CI, confidence interval; HR, hazard ratio; No., number; Ref, reference.
